# Supplementary material for: Differential effect of lacosamide on Nav1.7 variants from responsive and non-responsive patients with small fibre neuropathy
Source: PubMed Central journal article supplement — Brain. 2020 Feb 3;143(3):771–82. doi: 10.1093/brain/awaa016 (PMC7089662; doi:10.1093/brain/awaa016), 2020-02-03
Supplement: awaa016_supplementary_data.pdf [file awaa016_supplementary_data.pdf]

## Supplementary Material

| Number of patients | Nucleotide change             | Amino acid change                 | GoF        | Allele Freq (GnomAD)   | Allele count (GnomAD)             | Type of variation           | Classification ACGS guidelines                               | Overall LCM response | References                                                                                                 |
|--------------------|-------------------------------|-----------------------------------|------------|------------------------|-----------------------------------|-----------------------------|--------------------------------------------------------------|----------------------|------------------------------------------------------------------------------------------------------------|
| <b>1</b>           | <b>c.684C&gt;G</b>            | <b>p.Ile228Met</b>                | <b>YES</b> | <b>8.58e-4</b>         | <b>241/281046</b>                 | <b>missense</b>             | <b>Pathogenic</b>                                            | -                    | <b>(Faber <i>et al.</i>, 2012)<br/>(Persson <i>et al.</i>, 2013)<br/>(Estacion <i>et al.</i>, 2011)</b>    |
| <b>1</b>           | c.1552G>T                     | p.Val518Phe                       | UK         | 4.02e-6                | 1/249054                          | missense                    | Unknown significance                                         | +                    | (Eijkenboom <i>et al.</i> , 2019)                                                                          |
| <b>1</b>           | c.1592A>C                     | p.Thr531Asn                       | UK         | -                      | 0                                 | missense                    | Unknown significance                                         | +                    | (Eijkenboom <i>et al.</i> , 2019)                                                                          |
| <b>1</b>           | c.1691T>C                     | p.Ile564Thr                       | UK         | 1.21e-5                | 1/248986                          | missense                    | Unknown significance                                         | -                    | Unpublished data                                                                                           |
| <b>2</b>           | c.1964A>G                     | p.Lys655Arg                       | UK         | 1.90e-3                | 592/279028                        | missense                    | Unlikely to be pathogenic                                    | -                    | (Singh <i>et al.</i> , 2009)<br>(Klein <i>et al.</i> , 2003)<br>(Brouwer <i>et al.</i> , 2014)             |
| <b>1</b>           | <b>c.2157G&gt;C</b>           | <b>p.Trp719Cys</b>                | <b>UK</b>  | <b>9.81e-4</b>         | <b>293/243602</b>                 | <b>missense</b>             | Unknown significance                                         | +                    | (Eijkenboom <i>et al.</i> , 2019)                                                                          |
| <b>6*</b>          | <b>c.2215A&gt;G</b>           | <b>p.Ile739Val</b>                | <b>YES</b> | 2.47e-3                | <b>597/241656</b>                 | <b>missense</b>             | <b>Pathogenic risk factor</b>                                | +                    | <b>(Han <i>et al.</i>, 2012b)<br/>(Faber <i>et al.</i>, 2012)<br/>(Devigili <i>et al.</i>, 2014)</b>       |
| <b>1</b>           | c.2266C>A                     | p.Pro756Thr                       | UK         | 2.85e-5                | 7/245266                          | missense                    | Uncertain significance                                       | -                    | (Eijkenboom <i>et al.</i> , 2019)                                                                          |
| <b>1</b>           | c.3734A>G                     | p.Asn1245Ser                      | NO         | 4.4e-3                 | 1224/278244                       | missense                    | Unlikely to be pathogenic                                    | +                    | (Brouwer <i>et al.</i> , 2014)                                                                             |
| <b>4</b>           | <b>c.3799C&gt;G</b>           | <b>p.Leu1267Val</b>               | <b>YES</b> | <b>1.31e-3</b>         | <b>321/245832</b>                 | <b>missense</b>             | <b>Unknown significance</b><br>(data available upon request) | -                    | <b>(Huang <i>et al.</i>, 2014)<br/>(Della Mina <i>et al.</i>, 2015)<br/>(Wadhawan <i>et al.</i>, 2017)</b> |
| <b>1</b>           | c.5260G>T                     | p.Val1754Phe                      | UK         | -                      | 0                                 | -                           | Uncertain significance                                       | +                    | (Eijkenboom <i>et al.</i> , 2019)                                                                          |
| <b>3*</b>          | c.2794A>C<br>and<br>c.2971G>T | p.Met932Leu<br>and<br>p.Val991Leu | YES        | 3.38e-2 and<br>3.01e-2 | 9571/282670<br>and<br>7160/237770 | missense<br>and<br>missense | Pathogenic                                                   | +                    | (Faber <i>et al.</i> , 2012)<br>(Li <i>et al.</i> , 2015)                                                  |
| <b>2*</b>          | <b>c.4612T&gt;C</b>           | <b>p.Trp1538Arg</b>               | <b>YES</b> | <b>2.02e-3</b>         | <b>565/279548</b>                 | <b>missense</b>             | <b>Pathogenic</b>                                            | -                    | (Cregg <i>et al.</i> , 2013)                                                                               |
| <b>1</b>           | c.3595-11T>G                  | -                                 | UK         | -                      | 0                                 | splice-                     | Uncertain significance                                       | +                    | Unpublished data                                                                                           |
| <b>1</b>           | c.2842-6_2842-5delinsG        | -                                 | UK         | -                      | 0                                 | splice                      | Uncertain significance -                                     | -                    | Unpublished data                                                                                           |

**Supplementary Table 1. Summary of *SCN9A* variants reported in the cohort from the de Greef *et al.* (2019) study.** All participants were diagnosed with pure (or with Diabetes Mellitus) painful SFN, with an associated Na<sub>v</sub>1.7 variant.

Variants were classified and reported according the Practice Guidelines of the Association for Clinical Genetic Science (ACGS), Wallis, *et al.* (2013). Whenever the variant has functionally been assessed, the classification is reported accordingly, with appropriate referencing.

The star sign (\*) next to the patient number indicates that one or more patients carried at least one additional variant:

One out of the six patients carrying the I739V variant also carries M932L/V991L and W1538R

Two out of the three patients carrying the M932L/V991L double mutation carry additional variants: one patient carries the W1538R, and the other patient, both W1538R and I739V (same as above).

Both patients carrying the W1538R carry additional variants (as described above, the M932L/V991L variant, and the M932L/V991L + I739V variants)

Abbreviations: GoF (Gain-of-function), UK (unknown).
